# Supplementary material for: Highly active Pd–ZrO2 electrodes for hydrogen evolution reaction
Source: Royal Society of Chemistry journal article supplement (doi:10.1039/d3se00053b), 2023-01-01
Supplement: d3se00053b1.pdf [file d3se00053b1.pdf]

## SUPPORTING INFORMATION

### Highly active Pd-ZrO<sub>2</sub> electrodes for hydrogen evolution reaction

Simone Minelli, Sandra Rondinini, Xiufang He, Alberto Vertova\*, Cristina Lenardi, Claudio Piazzoni, Silvia Locarno *and* Alessandro Minguzzi

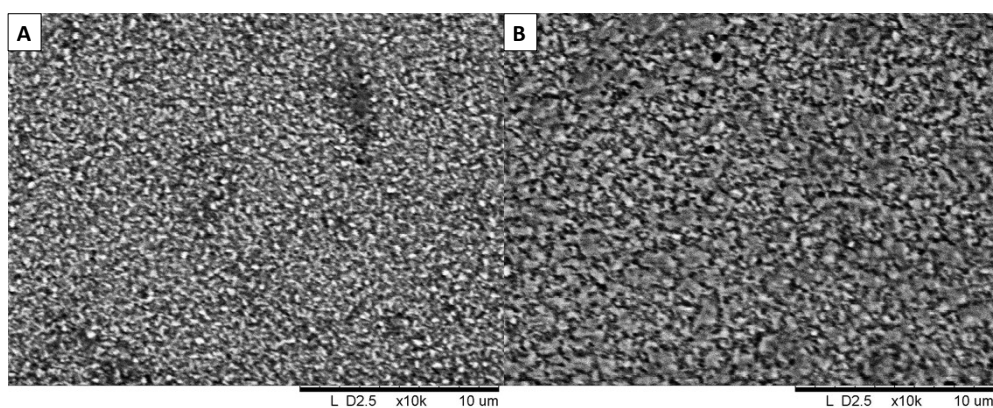

Figure S1. SEM image of Pd@ZrO<sub>2</sub>/FTO as pristine deposit of 50 and 200 nm thicknesses respectively A and B

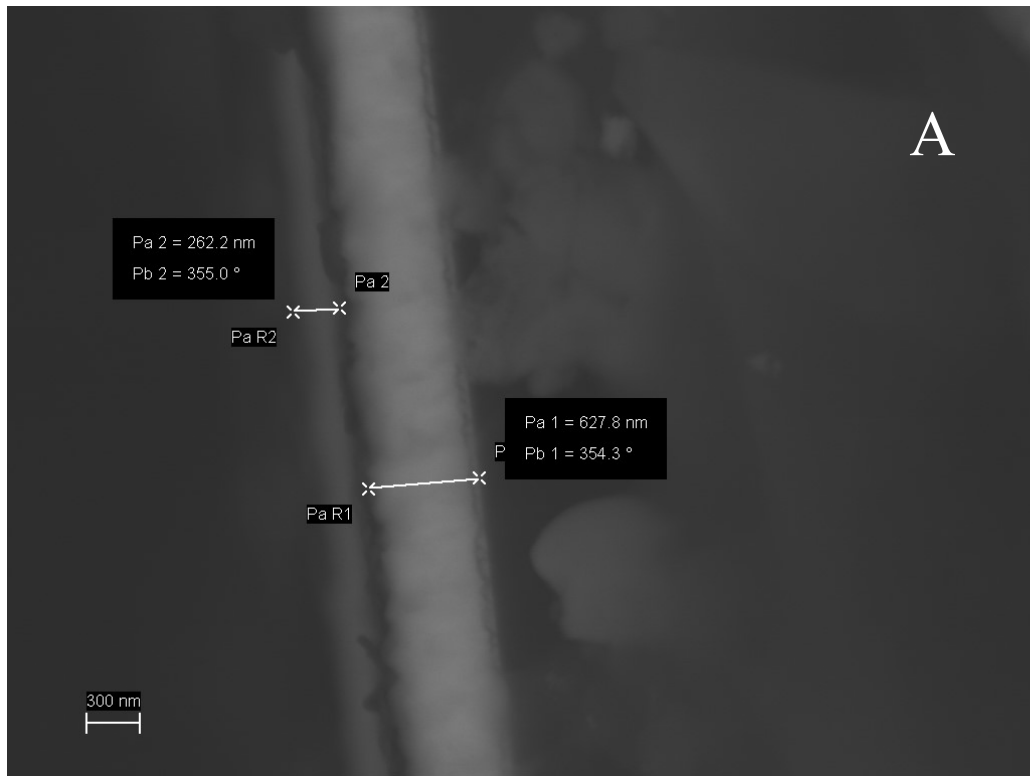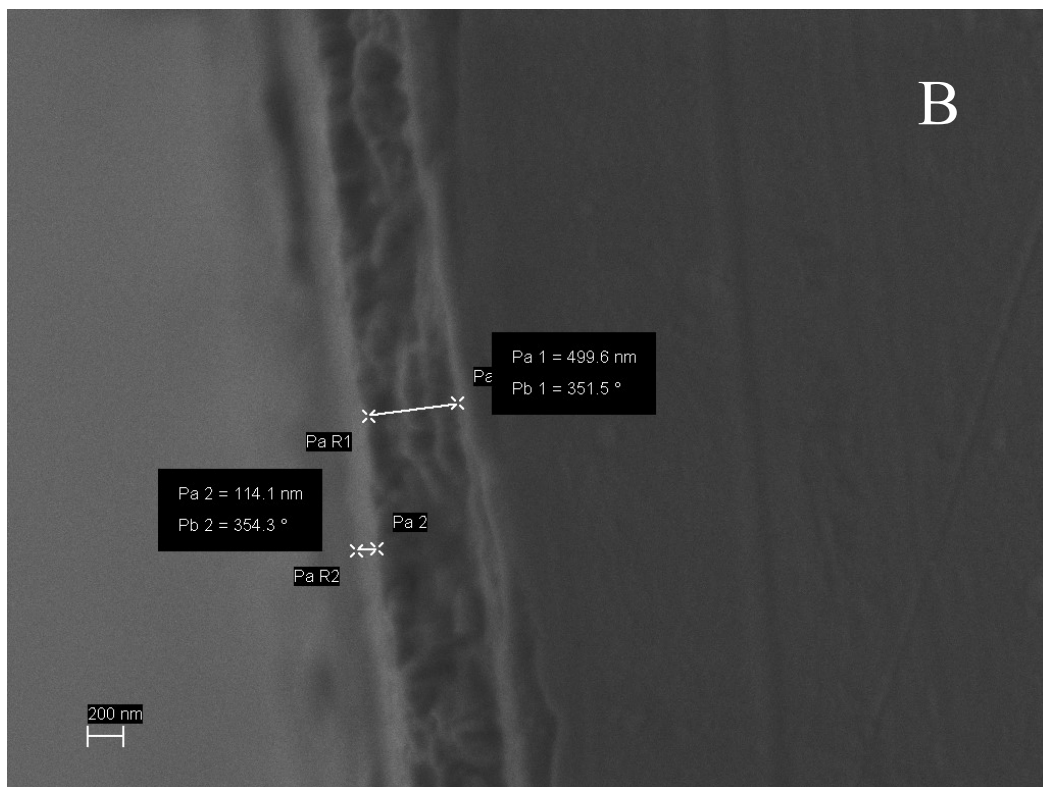

Figure S2 A and B. FESEM images of 200 nm Pd@ZrO<sub>2</sub>/FTO layers. A) Back Scattered Electrons mode, 10kV using a Working Distance of 10mm. B) Secondary Electrons mode.

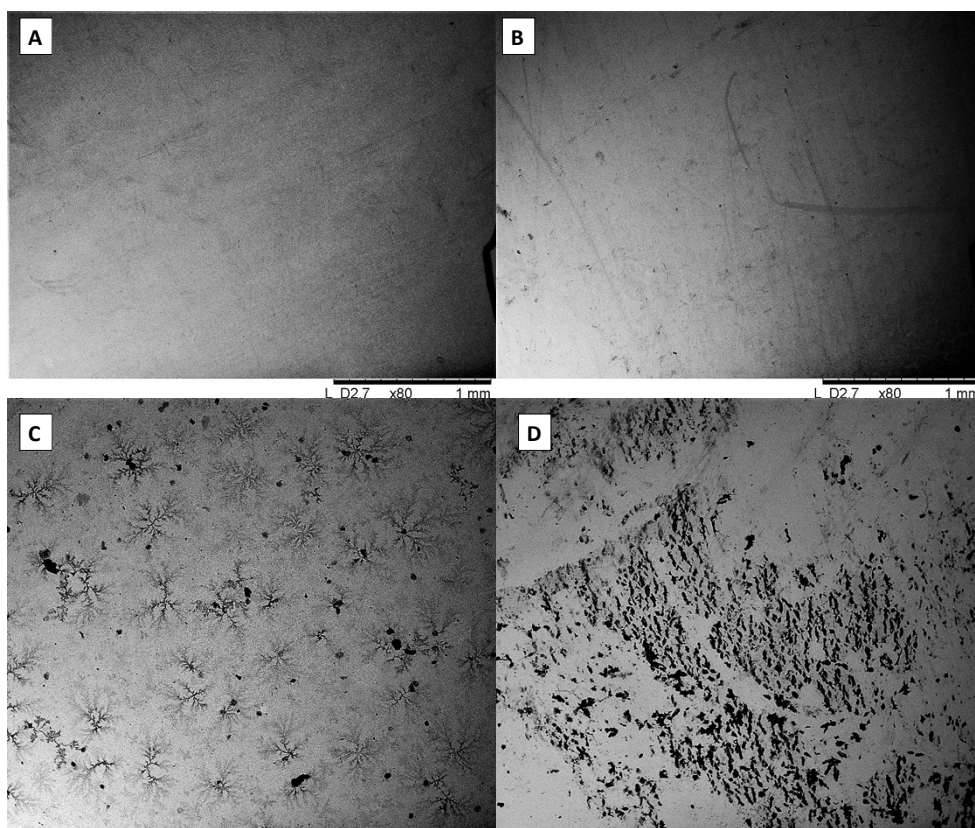

Figure S3 SEM images of Pd@ZrO<sub>2</sub> pristine samples: A) 50 nm; B) 200 nm. C) 50 nm after 5000 CV cycles. D) 200 nm after 8 CV cycles.
